# Supplementary material
Source: publisher figshare collection journal article supplement (https://asha.figshare.com/ndownloader/files/23827604)
Supplement: Supplementary file 1 [file 23827604]

## Supplemental Material S1. Cultural Awareness and Competence Scales (CACS)

### SLP and AUD Common Items

#### *Cultural Awareness and Community Involvement*

|                                                                                                                                                                                                                                                     |           |
|-----------------------------------------------------------------------------------------------------------------------------------------------------------------------------------------------------------------------------------------------------|-----------|
| 1. I plan to do some volunteer work in the future                                                                                                                                                                                                   | 1 2 3 4 5 |
| 2. Volunteering will help me succeed in my own profession                                                                                                                                                                                           | 1 2 3 4 5 |
| 3. I feel that I can make a difference in the world                                                                                                                                                                                                 | 1 2 3 4 5 |
| 4. I have been involved in organizations providing services to people from different cultural backgrounds                                                                                                                                           | 1 2 3 4 5 |
| 5. I am aware that my own cultural orientation and stereotype-linked biases can influence my view of other people’s culture                                                                                                                         | 1 2 3 4 5 |
| 6. I understand cultural differences in rules regarding social interaction (e.g., eye contact, personal space, touch, forms of address, expectations about male-female and same-gender interactions)                                                | 1 2 3 4 5 |
| 7. I understand how the social framework of the culture may affect service provision (e.g., the roles that community elders play in family decisions; different concepts of time; expectations about the structure of provider-client interactions) | 1 2 3 4 5 |
| 8. I understand cultural attitudes about disability                                                                                                                                                                                                 | 1 2 3 4 5 |
| 9. I understand differences in family dynamics (who are primary caregivers, who makes decisions)                                                                                                                                                    | 1 2 3 4 5 |
| 10. I understand cross-cultural differences in how professional service providers are expected to behave (e.g., collaborative vs. directive approaches to intervention)                                                                             | 1 2 3 4 5 |
| 11. I try to become non-judgmental and sensitized to cultural differences                                                                                                                                                                           | 1 2 3 4 5 |
| 12. I seek additional resources and education to develop cultural competence via coursework, education, volunteering, networking with community members, etc.                                                                                       | 1 2 3 4 5 |

#### *Cultural Competence: General Questions*

|                                                                                                                                                                                  |           |   |
|----------------------------------------------------------------------------------------------------------------------------------------------------------------------------------|-----------|---|
| 1. I am able to adapt my intervention approach to work within the social framework of the other culture (e.g., differences in concept of time and deadlines; social interaction) | 1 2 3 4 5 | N |
| 2. I use appropriate ethnographic interviewing techniques to obtain sensitive but crucial information                                                                            | 1 2 3 4 5 | N |
| 3. I communicate effectively with clients from another culture using language that is jargon-free and culturally relevant                                                        | 1 2 3 4 5 | N |
| 4. I develop rapport with clients                                                                                                                                                | 1 2 3 4 5 | N |
| 5. I collaborate effectively with other service providers                                                                                                                        | 1 2 3 4 5 | N |
| 6. I dress in a manner considered appropriate to the culture (e.g., pants vs. skirts for women)                                                                                  | 1 2 3 4 5 | N |
| 7. I am able to <u>understand</u> simple phrases in the client’s primary language                                                                                                | 1 2 3 4 5 | N |
| 8. I am able to <u>produce</u> simple phrases in the client’s primary language                                                                                                   | 1 2 3 4 5 | N |
| 9. I understand the role and responsibilities of an interpreter                                                                                                                  | 1 2 3 4 5 | N |
| 10. I am effective at using an interpreter when providing services to clients                                                                                                    | 1 2 3 4 5 | N |

## SLP and AUD Specific Items

### *Cultural Competence: Speech-Language Pathologists*

|                                                                                                                                                                                                                                                                |           |   |
|----------------------------------------------------------------------------------------------------------------------------------------------------------------------------------------------------------------------------------------------------------------|-----------|---|
| 1. I have knowledge of what is considered typical or normal child behavior in the culture (e.g., whether children are expected to remain quiet until directly addressed, appropriate behavior toward elders)                                                   | 1 2 3 4 5 |   |
| 2. I have knowledge of discipline practices in the culture                                                                                                                                                                                                     | 1 2 3 4 5 |   |
| 3. I have a basic knowledge of what is considered typical or normal <u>speech</u> development                                                                                                                                                                  | 1 2 3 4 5 |   |
| 4. I have knowledge of what is considered typical or normal <u>language</u> development in the culture (e.g., acquisition of nouns vs. social phrases; what is considered to be "normal" language acquisition)                                                 | 1 2 3 4 5 |   |
| 5. I have knowledge and resources about selecting or creating assessments and intervention materials                                                                                                                                                           | 1 2 3 4 5 |   |
| 6. I am competent at assessing a child's speech productions in the primary/ native language                                                                                                                                                                    | 1 2 3 4 5 | N |
| 7. I am competent at assessing a child's language development in the primary/ native language                                                                                                                                                                  | 1 2 3 4 5 | N |
| 8. I am able to recognize if a test is psychometrically flawed, translated and not adapted, culturally biased, and/or linguistically biased                                                                                                                    | 1 2 3 4 5 | N |
| 9. I am able to identify/adapt appropriate <u>assessment</u> strategies and materials that do not violate the client's unique values and/or create a chasm between the clinician and client and his/her community                                              | 1 2 3 4 5 | N |
| 10. I am able to identify/adapt appropriate <u>intervention</u> strategies and materials that do not violate the client's unique values and/or create a chasm between the clinician and client and his/her community                                           | 1 2 3 4 5 | N |
| 11. I am able to integrate the client's attitudes, values, and beliefs toward approaches to communication such as augmentative/alternative communication, sign language, and assistive listening devices when those approaches are incorporated into treatment | 1 2 3 4 5 | N |
| 12. I recognize when it is necessary to consult with other service providers who have cultural and linguistic proficiency relevant to the client, including the use of a cultural informant or broker                                                          | 1 2 3 4 5 | N |

### *Cultural Competence: Audiologists*

|                                                                                                                                                        |           |   |
|--------------------------------------------------------------------------------------------------------------------------------------------------------|-----------|---|
| 1. I provide instructions to clients on how to participate in audiological assessment procedures using culturally and linguistically relevant language | 1 2 3 4 5 | N |
| 2. I convey test results to clients and families using culturally and linguistically relevant language                                                 | 1 2 3 4 5 | N |
| 3. I develop culturally appropriate audiological management plans                                                                                      | 1 2 3 4 5 | N |
| 4. I provide culturally and linguistically relevant orientation to clients on using and maintaining hearing devices                                    | 1 2 3 4 5 | N |
| 5. I am able to use client-provided information to troubleshoot devices                                                                                | 1 2 3 4 5 | N |
| 6. I provide culturally and linguistically relevant counseling to families regarding how to enhance communication                                      | 1 2 3 4 5 | N |

*Self-Efficacy Beliefs: Speech-Language Pathologists*

|                                                                                                         |           |
|---------------------------------------------------------------------------------------------------------|-----------|
| 1. I am confident that I can have a positive impact on children and families' lives                     | 1 2 3 4 5 |
| 2. I am confident that I can collect information for the case history                                   | 1 2 3 4 5 |
| 3. I am confident that I can counsel families of children with disabilities                             | 1 2 3 4 5 |
| 4. I am confident that I can assess children from different cultures                                    | 1 2 3 4 5 |
| 5. I am confident that I can assess children who speak a language different that yours                  | 1 2 3 4 5 |
| 6. I am confident that I can diagnose the presence of a speech or language disorder                     | 1 2 3 4 5 |
| 7. I am confident that I can provide speech intervention                                                | 1 2 3 4 5 |
| 8. I am confident that I can provide language intervention                                              | 1 2 3 4 5 |
| 9. I am confident that I can communicate with families from different cultures                          | 1 2 3 4 5 |
| 10. I am confident that I can communicate with families using a language that is not my native language | 1 2 3 4 5 |
| 11. I am confident that I can collaborate with parents/families                                         | 1 2 3 4 5 |
| 12. I am confident that I can collaborate with local service providers                                  | 1 2 3 4 5 |
| 13. I am confident that I can collaborate with interpreters/cultural brokers                            | 1 2 3 4 5 |

*Self-Efficacy Beliefs: Audiologists*

|                                                                                                         |           |
|---------------------------------------------------------------------------------------------------------|-----------|
| 1. I am confident that I can have a positive impact on patient's lives                                  | 1 2 3 4 5 |
| 2. I am confident that I can collect information for the case history                                   | 1 2 3 4 5 |
| 3. I am confident that I can counsel families of children with disabilities/patients                    | 1 2 3 4 5 |
| 4. I am confident that I can evaluate patients from different cultures                                  | 1 2 3 4 5 |
| 5. I am confident that I can assess patients who speak a language different that mine                   | 1 2 3 4 5 |
| 6. I am confident that I can obtain reliable test results when assessing clients who have special needs | 1 2 3 4 5 |
| 7. I am confident that I can communicate with patients from different cultures                          | 1 2 3 4 5 |
| 8. I am confident that I can communicate with patients using a language different than mine             | 1 2 3 4 5 |
| 9. I am confident that I can collaborate with parents/families                                          | 1 2 3 4 5 |
| 10. I am confident that I can collaborate with local service providers                                  | 1 2 3 4 5 |
| 11. I am confident that I can collaborate with interpreters/cultural brokers                            | 1 2 3 4 5 |
